# Supplementary material
Source: PubMed Central journal article supplement (PMC4679450)
Supplement: NIHMS733266-supplement-Suppl1.pdf [file NIHMS733266-supplement-Suppl1.pdf]

**Supplementary Material:**

Psychometric modeling of abuse and dependence symptoms across six illicit substances  
indicates novel dimensions of misuse

**Table S1.** Substance factor loading estimates and standard errors for model M3

| Symptoms | Substance Factors |                 |                 |                 |                 |                 |
|----------|-------------------|-----------------|-----------------|-----------------|-----------------|-----------------|
|          | Cannabis          | Sedatives       | Stimulants      | Cocaine         | Opioids         | Hallucinogens   |
| A1       | 0.34*<br>(0.08)   | 0.34<br>(0.22)  | 0.49*<br>(0.18) | 0.46*<br>(0.14) | 0.40*<br>(0.18) | 0.31<br>(0.17)  |
| A2       | 0.43*<br>(0.11)   | 0.74*<br>(0.26) | 0.85*<br>(0.27) | 0.61*<br>(0.10) | 0.70*<br>(0.26) | 0.73*<br>(0.27) |
| A3       | 0.55*<br>(0.09)   | 0.79*<br>(0.27) | 0.71*<br>(0.23) | 0.72*<br>(0.11) | 0.82*<br>(0.14) | 0.43*<br>(0.21) |
| A4       | 0.35*<br>(0.12)   | 0.60*<br>(0.27) | 0.38*<br>(0.17) | 0.58*<br>(0.09) | 0.97*<br>(0.15) | 0.39*<br>(0.18) |
| A5       | 0.49*<br>(0.12)   | 0.43*<br>(0.21) | 0.34*<br>(0.16) | 0.63*<br>(0.11) | 0.47*<br>(0.15) | 0.56*<br>(0.21) |
| A6       | 0.67*<br>(0.12)   | 0.77*<br>(0.28) | 0.79*<br>(0.25) | 0.68*<br>(0.10) | 0.60*<br>(0.19) | 0.46<br>(0.25)  |
| D1       | 0.58*<br>(0.15)   | 0.59<br>(0.32)  | 0.55<br>(0.29)  | 0.81*<br>(0.07) | 0.68*<br>(0.19) | 0.82*<br>(0.25) |
| D2       | 0.30*<br>(0.13)   | 0.39*<br>(0.19) | 0.35*<br>(0.15) | 0.34*<br>(0.11) | 0.29<br>(0.17)  | 0.41*<br>(0.17) |
| D3       | 0.74*<br>(0.14)   | 0.74*<br>(0.32) | 0.81*<br>(0.26) | 0.84*<br>(0.01) | 0.71*<br>(0.17) | 0.60*<br>(0.22) |
| D4       | 0.83*<br>(0.13)   | 0.78*<br>(0.34) | 0.82*<br>(0.27) | 0.86*<br>(0.08) | 0.72*<br>(0.26) | 0.77*<br>(0.32) |
| D5       | 0.64*<br>(0.18)   | 0.42<br>(0.36)  | 0.46<br>(0.37)  | 0.79*<br>(0.07) | 0.71*<br>(0.16) | 0.67*<br>(0.29) |
| D6       | 0.62*<br>(0.23)   | 0.66<br>(0.34)  | 0.62*<br>(0.28) | 0.79*<br>(0.11) | 0.64*<br>(0.19) | 0.93*<br>(0.32) |
| D7       | 0.63*<br>(0.28)   | 0.70*<br>(0.35) | 0.68*<br>(0.28) | 0.72*<br>(0.15) | 0.70*<br>(0.19) | 0.66*<br>(0.30) |

*Note.* Factor loading estimates are following by their corresponding standard errors in parentheses. Symptom meaning: A1= Hazardous use; A2 = Consequences: legal; A3 = Consequences: Social; A4 = Consequences: Physical and psychological; A5 = Used often when doing something . . . important; A6 = Stay away from school\miss appointments; D1 = Used more of longer than thought\planned; D2 = Loss of control: unable to stop\desire to stop; D3 = Spend time taking\using it, recovering from it; D4 = Used instead of work\hobbies; D5 = Need for larger amounts\doses (tolerance); D6 = Withdrawal symptoms: Feeling sick when cutting down\stopping; D7 = Withdrawal symptoms: After not using . . . use to prevent sickness. \*  $p$ -value < 0.05.

**Table S2.** Misuse symptom factor loading estimates and standard errors for model M3

| Substances    | Misuse Symptom Factors |        |        |        |        |        |
|---------------|------------------------|--------|--------|--------|--------|--------|
|               | A1                     | A2     | A3     | A4     | A5     | A6     |
| Cannabis      | 0.63*                  | 0.70*  | 0.58*  | 0.59*  | 0.52*  | 0.60*  |
|               | (0.05)                 | (0.14) | (0.08) | (0.13) | (0.08) | (0.11) |
| Sedatives     | 0.81*                  | 0.52*  | 0.69*  | 0.58*  | 0.80*  | 0.69*  |
|               | (0.07)                 | (0.25) | (0.18) | (0.29) | (0.11) | (0.26) |
| Stimulants    | 0.78*                  | 0.64*  | 0.65*  | 0.64*  | 0.74*  | 0.70*  |
|               | (0.07)                 | (0.26) | (0.13) | (0.14) | (0.07) | (0.18) |
| Cocaine       | 0.89*                  | 0.66*  | 0.69*  | 0.49*  | 0.76*  | 0.69*  |
|               | (0.06)                 | (0.16) | (0.10) | (0.16) | (0.09) | (0.12) |
| Opioids       | 0.57*                  | 0.63*  | 0.23   | 0.12   | 0.52*  | 0.49*  |
|               | (0.13)                 | (0.30) | (0.27) | (0.32) | (0.15) | (0.20) |
| Hallucinogens | 0.59*                  | 0.51   | 0.58*  | 0.45*  | 0.60*  | 0.55*  |
|               | (0.09)                 | (0.28) | (0.14) | (0.14) | (0.12) | (0.13) |

  

| Substances    | D1     | D2     | D3     | D4     | D5     | D6     | D7     |
|---------------|--------|--------|--------|--------|--------|--------|--------|
| Cannabis      | 0.22   | 0.78*  | 0.35   | 0.12   | 0.30   | 0.37   | 0.56   |
|               | (0.29) | (0.06) | (0.30) | (0.41) | (0.30) | (0.27) | (0.33) |
| Sedatives     | 0.74*  | 0.90*  | 0.68*  | 0.58   | 0.84*  | 0.52*  | 0.71*  |
|               | (0.16) | (0.06) | (0.28) | (0.34) | (0.21) | (0.25) | (0.27) |
| Stimulants    | 0.72*  | 0.94*  | 0.56   | 0.40   | 0.83*  | 0.47*  | 0.63*  |
|               | (0.24) | (0.04) | (0.31) | (0.45) | (0.23) | (0.22) | (0.26) |
| Cocaine       | 0.16   | 0.85*  | 0.08   | 0.09   | 0.05   | 0.28   | 0.51*  |
|               | (0.26) | (0.05) | (0.25) | (0.32) | (0.24) | (0.22) | (0.23) |
| Opioids       | 0.74*  | 0.87*  | 0.86*  | 0.98*  | 0.69*  | 0.60*  | 0.77*  |
|               | (0.30) | (0.07) | (0.29) | (0.35) | (0.24) | (0.25) | (0.27) |
| Hallucinogens | 0.26   | 0.84*  | 0.45   | 0.57   | 0.51   | 0.39   | 0.61   |
|               | (0.42) | (0.07) | (0.24) | (0.34) | (0.32) | (0.33) | (0.37) |

*Note.* Factor loading estimates are following by their corresponding standard errors in parentheses. Symptom meaning: A1= Hazardous use; A2 = Consequences: legal; A3 = Consequences: Social; A4 = Consequences: Physical and psychological; A5 = Used often when doing something . . . important; A6 = Stay away from school\miss appointments; D1 = Used more of longer than thought\planned; D2 = Loss of control: unable to stop\desire to stop; D3 = Spend time taking\using it, recovering from it; D4 = Used instead of work\hobbies; D5 = Need for larger amounts\doses (tolerance); D6 = Withdrawal symptoms: Feeling sick when cutting down\stopping; D7 = Withdrawal symptoms: After not using . . . use to prevent sickness. \**p*-value < 0.05.

**Table S3.** Substance factor correlation estimates and standard errors for model M3

| Substance Factor | Cannabis       | Sedatives       | Stimulants      | Cocaine        | Opioids      | Hallucinogens. |
|------------------|----------------|-----------------|-----------------|----------------|--------------|----------------|
| Cannabis         | 1.00<br>0.48   |                 |                 |                |              |                |
| Sedatives        | (0.33)<br>0.63 | 1.00<br>0.67    |                 |                |              |                |
| Stimulants       | (0.34)<br>0.36 | (0.38)<br>0.39  | 1.00<br>0.54    |                |              |                |
| Cocaine          | (0.22)<br>0.17 | (0.39)<br>0.56  | (0.28)<br>0.49  | 1.00<br>0.65*  |              |                |
| Opioids          | (0.35)<br>0.48 | (0.83)<br>0.88* | (0.52)<br>0.73* | (0.31)<br>0.39 | 1.00<br>0.56 |                |
| Hallucinogens    | (0.35)         | (0.32)          | (0.31)          | (0.32)         | (0.49)       | 1.00           |

*Note.* Correlation estimates are following by their corresponding standard errors in parentheses. \**p*-value < 0.05.

**Table S4.** Misuse symptom factor correlation estimates and standard errors for model M3.

| Misuse Factors | A1              | A2              | A3              | A4              | A5              | A6              | D1             | D2              | D3             | D4              | D5              | D6             | D7   |
|----------------|-----------------|-----------------|-----------------|-----------------|-----------------|-----------------|----------------|-----------------|----------------|-----------------|-----------------|----------------|------|
| A1             | 1.00            |                 |                 |                 |                 |                 |                |                 |                |                 |                 |                |      |
| A2             | 0.40*<br>(0.12) | 1.00            |                 |                 |                 |                 |                |                 |                |                 |                 |                |      |
| A3             | 0.57*<br>(0.09) | 0.46*<br>(0.15) | 1.00            |                 |                 |                 |                |                 |                |                 |                 |                |      |
| A4             | 0.51*<br>(0.13) | 0.40<br>(0.21)  | 0.52*<br>(0.16) | 1.00            |                 |                 |                |                 |                |                 |                 |                |      |
| A5             | 0.55*<br>(0.08) | 0.24<br>(0.17)  | 0.30*<br>(0.14) | 0.44*<br>(0.13) | 1.00            |                 |                |                 |                |                 |                 |                |      |
| A6             | 0.29*<br>(0.14) | 0.09<br>(0.22)  | 0.29<br>(0.19)  | 0.26<br>(0.22)  | 0.22<br>(0.15)  | 1.00            |                |                 |                |                 |                 |                |      |
| D1             | 0.10<br>(0.27)  | 0.04<br>(0.37)  | -0.02<br>(0.36) | 0.40<br>(0.32)  | -0.08<br>(0.25) | -0.02<br>(0.35) | 1.00           |                 |                |                 |                 |                |      |
| D2             | -0.15<br>(0.09) | 0.09<br>(0.14)  | 0.14<br>(0.12)  | 0.11<br>(0.15)  | -0.13<br>(0.12) | 0.12<br>(0.12)  | 0.01<br>(0.33) | 1.00            |                |                 |                 |                |      |
| D3             | 0.08<br>(0.27)  | 0.07<br>(0.34)  | -0.17<br>(0.35) | 0.07<br>(0.29)  | 0.03<br>(0.27)  | -0.21<br>(0.36) | 0.36<br>(0.30) | -0.28<br>(0.23) | 1.00           |                 |                 |                |      |
| D4             | 0.13<br>(0.33)  | 0.25<br>(0.40)  | 0.05<br>(0.47)  | 0.56<br>(0.41)  | 0.001<br>(0.38) | 0.05<br>(0.64)  | 0.55<br>(0.36) | -0.24<br>(0.25) | 0.42<br>(0.30) | 1.00            |                 |                |      |
| D5             | 0.08<br>(0.24)  | 0.09<br>(0.37)  | -0.12<br>(0.38) | 0.28<br>(0.28)  | -0.10<br>(0.26) | 0.05<br>(0.33)  | 0.73<br>(0.29) | -0.02<br>(0.23) | 0.59<br>(0.42) | -0.65<br>(0.42) | 1.00            |                |      |
| D6             | 0.03<br>(0.18)  | -0.04<br>(0.41) | -0.10<br>(0.41) | 0.50<br>(0.34)  | -0.33<br>(0.33) | -0.19<br>(0.42) | 0.58<br>(0.37) | 0.12<br>(0.24)  | 0.60<br>(0.26) | 0.60<br>(0.38)  | 0.96<br>(0.47)  | 1.00           |      |
| D7             | 0.09<br>(0.23)  | 0.17<br>(0.33)  | -0.07<br>(0.31) | 0.56*<br>(0.24) | 0.08<br>(0.24)  | 0.07<br>(0.36)  | 0.59<br>(0.26) | 0.06<br>(0.21)  | 0.50<br>(0.23) | 0.52<br>(0.31)  | 0.77*<br>(0.25) | 0.15<br>(0.24) | 1.00 |

*Note.* Correlation estimates are following by their corresponding standard errors in parentheses. Symptom meaning: A1= Hazardous use; A2 = Consequences: legal; A3 = Consequences: Social; A4 = Consequences: Physical and psychological; A5 = Used often when doing something . . . important; A6 = Stay away from school\miss appointments; D1 = Used more of longer than thought\planned; D2 = Loss of control: unable to stop\desire to stop; D3 = Spend time taking\using it, recovering from it; D4 = Used instead of work\hobbies; D5 = Need for larger amounts\doses (tolerance); D6 = Withdrawal symptoms: Feeling sick when cutting down\stopping; D7 = Withdrawal symptoms: After not using . . .use to prevent sickness. \**p*-value < 0.05.
